# Supplementary material
Source: MDPI journal article supplement (https://www.mdpi.com/2077-0472/12/10/1733)
Supplement: s1 [file s1 › agriculture-1909067-supplementary.pdf]

**Supplementary Table S1.** Details of field treatments applied under puddled transplanted rice-wheat cropping system.

| Treatment                                                                                          | Treatment acronym |
|----------------------------------------------------------------------------------------------------|-------------------|
| T1. Wheat was sown following conventional tillage without paddy straw                              | CTW (-R)          |
| T2. Zero till wheat sown with Happy Seeder with paddy straw                                        | ZTW (+R)          |
| T3. Wheat was sown following conventional tillage after incorporating paddy straw with disc harrow | CTW (+R)          |
| T4. Zero till wheat sown with Happy Seeder with 100% rice straw as mulch                           | ZTW (+WR)         |
| T5. Wheat was sown with zero till drill after partial burning of rice straw (Farmer practice)      | ZTW (RB)          |

R: Rice residue, WR: wheat and rice straw, RB: Rice residue burnt.

**Supplementary Table S2.** Effect of different straw management practices on soil bulk density ( $\text{g cm}^{-3}$ ), soil organic carbon (SOC), total organic carbon (TOC) and various carbon fractions of soil sampled at three successive depths at harvest of wheat in rice-wheat cropping system.

| Treatments                                  | Bulk Density ( $\text{g cm}^{-3}$ ) |          |          |
|---------------------------------------------|-------------------------------------|----------|----------|
|                                             | Depth                               |          |          |
|                                             | 0-15 cm                             | 15-30 cm | 30-45 cm |
| CTW (-R)                                    | 1.39b                               | 1.53b    | 1.65c    |
| ZTW (+R)                                    | 1.32a                               | 1.47a    | 1.56a    |
| CTW (+R)                                    | 1.33a                               | 1.50ab   | 1.61b    |
| ZTW (+WR)                                   | 1.32a                               | 1.47a    | 1.55a    |
| ZTW (RB)                                    | 1.38b                               | 1.52b    | 1.65c    |
| Soil organic carbon ( $\text{g kg}^{-1}$ )  |                                     |          |          |
| CTW (-R)                                    | 4.54d                               | 3.68c    | 3.09c    |
| ZTW (+R)                                    | 6.22b                               | 4.35a    | 3.39a    |
| CTW (+R)                                    | 5.67c                               | 4.15ab   | 3.26b    |
| ZTW (+WR)                                   | 6.84a                               | 4.42a    | 3.48a    |
| ZTW (RB)                                    | 4.82d                               | 3.82bc   | 3.19c    |
| Total organic carbon ( $\text{g kg}^{-1}$ ) |                                     |          |          |
| CTW (-R)                                    | 7.86e                               | 5.82d    | 4.38c    |
| ZTW (+R)                                    | 9.91b                               | 6.94a    | 4.85a    |
| CTW (+R)                                    | 9.23c                               | 6.58b    | 4.65b    |
| ZTW (+WR)                                   | 10.75a                              | 7.05a    | 4.95a    |
| ZTW (RB)                                    | 8.23d                               | 6.01c    | 4.52b    |
| Very labile SOC ( $\text{g kg}^{-1}$ )      |                                     |          |          |
| CTW (-R)                                    | 1.63e                               | 1.38     | 0.82     |
| ZTW (+R)                                    | 2.49b                               | 1.55     | 0.92     |
| CTW (+R)                                    | 2.22c                               | 1.43     | 0.85     |
| ZTW (+WR)                                   | 2.80a                               | 1.54     | 0.97     |
| ZTW (RB)                                    | 1.56d                               | 1.30     | 0.84     |
| Labile SOC ( $\text{g kg}^{-1}$ )           |                                     |          |          |
| CTW (-R)                                    | 1.32e                               | 1.16     | 1.07     |
| ZTW (+R)                                    | 1.75b                               | 1.37     | 1.24     |
| CTW (+R)                                    | 1.62c                               | 1.28     | 1.08     |
| ZTW (+WR)                                   | 1.87a                               | 1.37     | 1.11     |
| ZTW (RB)                                    | 1.40d                               | 1.25     | 1.08     |
| Less labile SOC ( $\text{g kg}^{-1}$ )      |                                     |          |          |
| CTW (-R)                                    | 1.59e                               | 1.22     | 1.21     |
| ZTW (+R)                                    | 1.98b                               | 1.43     | 1.33     |
| CTW (+R)                                    | 1.84c                               | 1.45     | 1.32     |
| ZTW (+WR)                                   | 2.14a                               | 1.40     | 1.42     |
| ZTW (RB)                                    | 1.74d                               | 1.27     | 1.26     |
| Non labile SOC ( $\text{g kg}^{-1}$ )       |                                     |          |          |
| CTW (-R)                                    | 3.32d                               | 2.14c    | 1.29     |
| ZTW (+R)                                    | 3.69b                               | 2.59a    | 1.46     |
| CTW (+R)                                    | 3.56c                               | 2.43b    | 1.39     |
| ZTW (+WR)                                   | 3.91a                               | 2.63a    | 1.47     |
| ZTW (RB)                                    | 3.41d                               | 2.19c    | 1.33     |

Figures in a column followed by the same alphabets do not differ significantly at  $p \leq 0.05$  as analysed through Duncan's multiple range test (DMRT).
